# Supplementary material for: Effect of Annealing Process and Molecular Weight on the Polymorphic Transformation from Form II to Form I of Poly(1-butene)
Source: MDPI journal article supplement (doi:10.3390/polym15040800), 2023-02-05
Supplement: s1 [file s1]

# Effect of Annealing Process and Molecular Weight on the Polymorphic Transformation from Form II to Form I of Poly(1-Butene)

Zhenkang Zhang <sup>1,2</sup>, Yanhu Xue <sup>1,\*</sup>, Rui Li <sup>2</sup>, Wei Liu <sup>2</sup>, Peng Liu <sup>1</sup> and Xiangling Ji <sup>2,\*</sup>

<sup>1</sup> College of Chemical Engineering and Materials Science, Tianjin University of Science and Technology, Tianjin 300457, China

<sup>2</sup> State Key Laboratory of Polymer Physics and Chemistry, Changchun Institute of Applied Chemistry, Chinese Academy of Sciences, Changchun 130022, China

\* Correspondence: xueyh@tust.edu.cn (Y.X.); xliji@ciac.ac.cn (X.J.); Tel.: +86-22-60601140 (Y.X.); +86-431-85262876 (X.J.)

**Table S1.** The crystal Form I contents of five samples at different stepwise annealing condition.

| Sample | $M_w(10^3 \text{ g/mol})$ | $X_{I, T=-10^\circ\text{C}}(\%)$ | $X_{I, T_I=-10^\circ\text{C}, T_H=40^\circ\text{C}}(\%)$ | $X_{I, T_H=40^\circ\text{C}}(\%)$ |
|--------|---------------------------|----------------------------------|----------------------------------------------------------|-----------------------------------|
| F1     | 23                        | 1.02                             | 6.03                                                     | 0.78                              |
| F2     | 109                       | 5.28                             | 36.34                                                    | 1.48                              |
| F3     | 201                       | 15.23                            | 59.62                                                    | 4.12                              |
| F4     | 360                       | 19.14                            | 64.61                                                    | 4.67                              |
| F5     | 710                       | 18.66                            | 46.15                                                    | 3.88                              |

**Table S2.** The crystal Form I contents of five samples at different low annealing temperatures ( $T_I$ ).

| Temperature<br>(°C) | $X_I(\%)$ |       |       |       |       |
|---------------------|-----------|-------|-------|-------|-------|
|                     | 23k       | 109k  | 201k  | 360k  | 710k  |
| $T_I = -50$         | 1.51      | 1.75  | 23.17 | 52.25 | 20.06 |
| $T_I = -20$         | 4.67      | 5.46  | 38.88 | 57.42 | 37.97 |
| $T_I = -10$         | 6.03      | 36.34 | 59.62 | 64.61 | 46.15 |
| $T_I = 0$           | 4.11      | 12.15 | 33.87 | 56.27 | 40.55 |
| $T_I = 10$          | 2.41      | 12.03 | 20.61 | 47.86 | 27.24 |
| $T_I = 40$          | 0.78      | 1.48  | 4.12  | 4.67  | 3.88  |

**Table S3.** The crystal Form I contents of five samples at different high annealing temperatures ( $T_h$ )

| Temperature<br>(°C) | $X_I$ (%) |       |       |       |       |
|---------------------|-----------|-------|-------|-------|-------|
|                     | 23k       | 109k  | 201k  | 360k  | 710k  |
| $T_h=10$            | 1.77      | 15.17 | 45.18 | 53.00 | 38.31 |
| $T_h=20$            | 2.43      | 36.03 | 59.06 | 63.44 | 45.97 |
| $T_h=30$            | 4.43      | 18.62 | 46.85 | 48.57 | 44.17 |
| $T_h=40$            | 6.03      | 36.34 | 59.62 | 64.61 | 46.15 |
| $T_h=50$            | 4.81      | 35.02 | 54.52 | 61.26 | 40.14 |
| $T_h=60$            | 3.69      | 18.54 | 32.10 | 52.18 | 26.51 |

**Table S4.** The crystal Form I contents of five samples at different low annealing time ( $t_l$ )

| Time(min) | $X_I$ (%) |       |       |       |       |
|-----------|-----------|-------|-------|-------|-------|
|           | 23k       | 109k  | 201k  | 360k  | 710k  |
| $t_l=0$   | 5.50      | 17.75 | 37.70 | 40.32 | 15.08 |
| $t_l=10$  | 5.81      | 18.73 | 52.71 | 56.82 | 30.54 |
| $t_l=30$  | 6.05      | 26.68 | 57.32 | 60.85 | 40.69 |
| $t_l=60$  | 6.60      | 36.53 | 60.98 | 64.06 | 46.79 |
| $t_l=100$ | 7.19      | 37.07 | 63.41 | 65.49 | 51.16 |
| $t_l=150$ | 8.19      | 39.70 | 63.96 | 66.79 | 54.16 |

**Table S5.** The crystal Form I contents of five samples at different high annealing time ( $t_h$ )

| Time(min) | $X_I$ (%) |       |       |       |       |
|-----------|-----------|-------|-------|-------|-------|
|           | 23k       | 109k  | 201k  | 360k  | 710k  |
| $t_h=0$   | 0.21      | 2.35  | 7.62  | 9.44  | 4.04  |
| $t_h=40$  | 1.45      | 11.08 | 34.25 | 37.66 | 19.71 |
| $t_h=100$ | 2.41      | 20.84 | 49.77 | 53.30 | 32.96 |
| $t_h=160$ | 4.24      | 29.51 | 57.17 | 59.97 | 41.21 |
| $t_h=220$ | 6.07      | 36.34 | 61.21 | 64.33 | 46.15 |
| $t_h=300$ | 12.43     | 44.45 | 64.19 | 67.40 | 49.93 |
